# Supplementary material
Source: publisher figshare collection journal article supplement (https://acs.figshare.com/ndownloader/files/3803548)
Supplement: Supplementary file 1 [file 3803548]

# Supporting Information

## **Fast, sensitive and selective ion-triggered disassembly and release based on tris(bipyridine)ruthenium(II) -functionalized metal-organic frameworks**

*Xiaomei Lin<sup>a</sup>, Fenqiang Luo<sup>a</sup>, Liyan Zheng<sup>b</sup>, Gongmin Gao<sup>a</sup>, Yuwu Chi<sup>a\*</sup>*

<sup>a</sup>MOE Key Laboratory of Analysis and Detection Technology for Food Safety, Fujian Provincial Key Laboratory of Analysis and Detection Technology for Food Safety, and Department of Chemistry, Fuzhou University, Fuzhou, Fujian, 350108, China.

<sup>b</sup>Key Laboratory of Medicinal Chemistry for Natural Resource (Yunnan University), Ministry of Education, School of Chemical Science and Technology, Yunnan University, Kun-ming, Yunnan 650091, China

\*e-mail: [y.w.chi@fzu.edu.cn](mailto:y.w.chi@fzu.edu.cn) (Yuwu Chi)

Tel: +86-591-22866137; Fax: +86-591-22866137

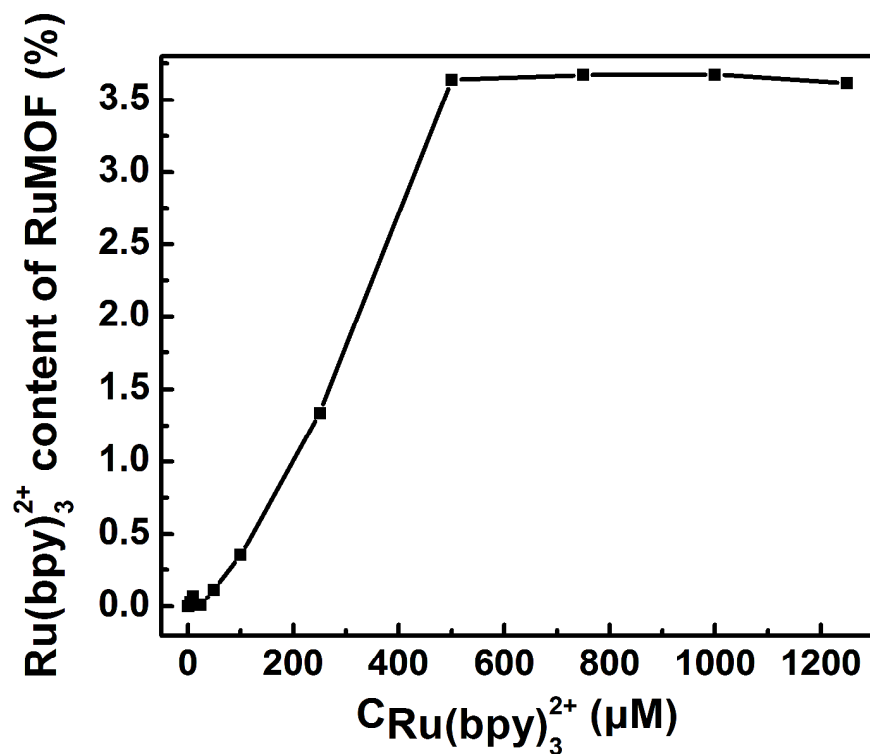

**Figure S1.** Dependence of Ru(bpy)<sub>3</sub><sup>2+</sup> content (weight percentage) in RuMOFs on the initial concentration of Ru(bpy)<sub>3</sub><sup>2+</sup> in the synthesis solution. The amounts of other reactants in the synthesis solution were: adenine (0.125 mmol), BPDC (0.25 mmol), zinc nitrate hexahydrate (0.375 mmol), in a mixed solvent of nitric acid (1 mmol), DMF (13.5 mL) and water (1 mL).

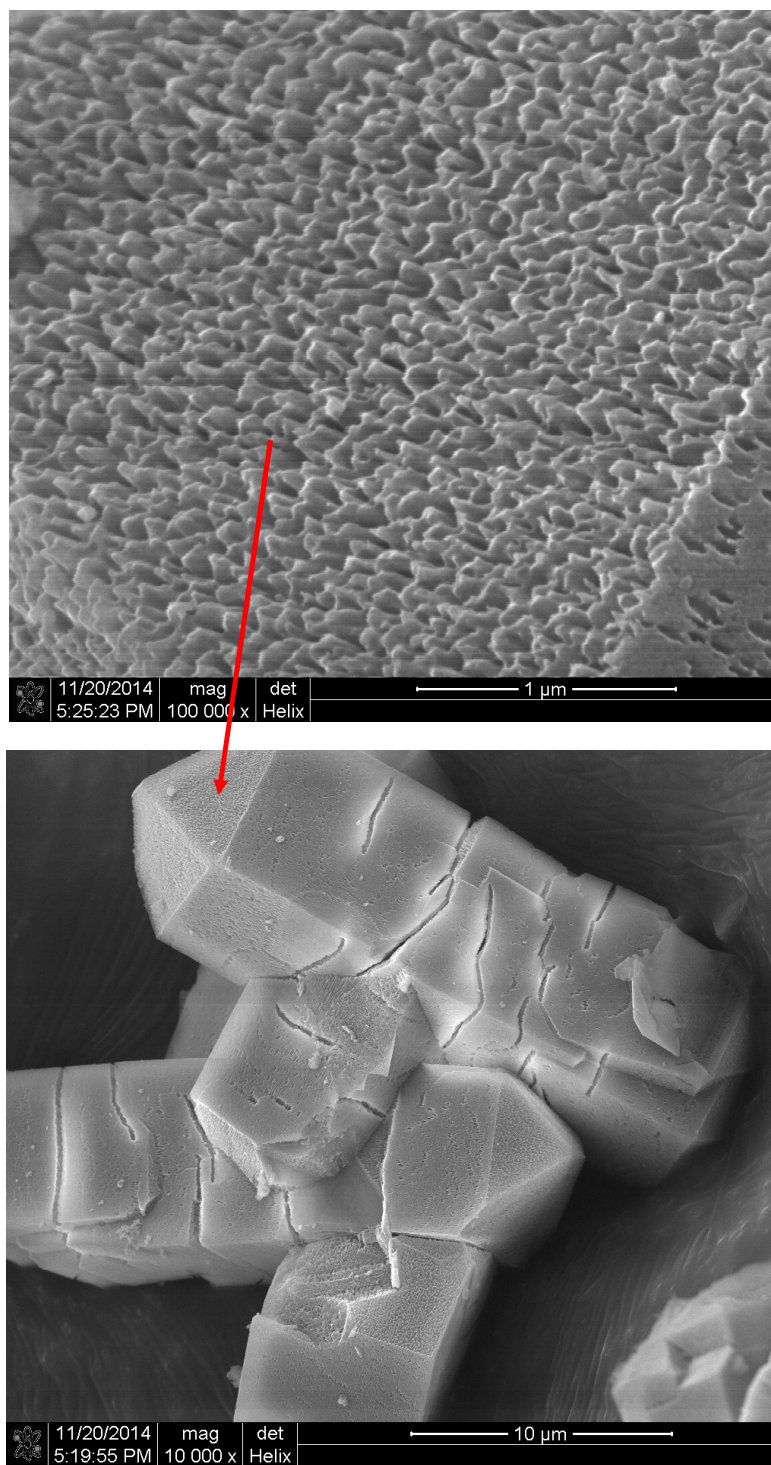

**Figure S2.** SEM images of RuMOFs

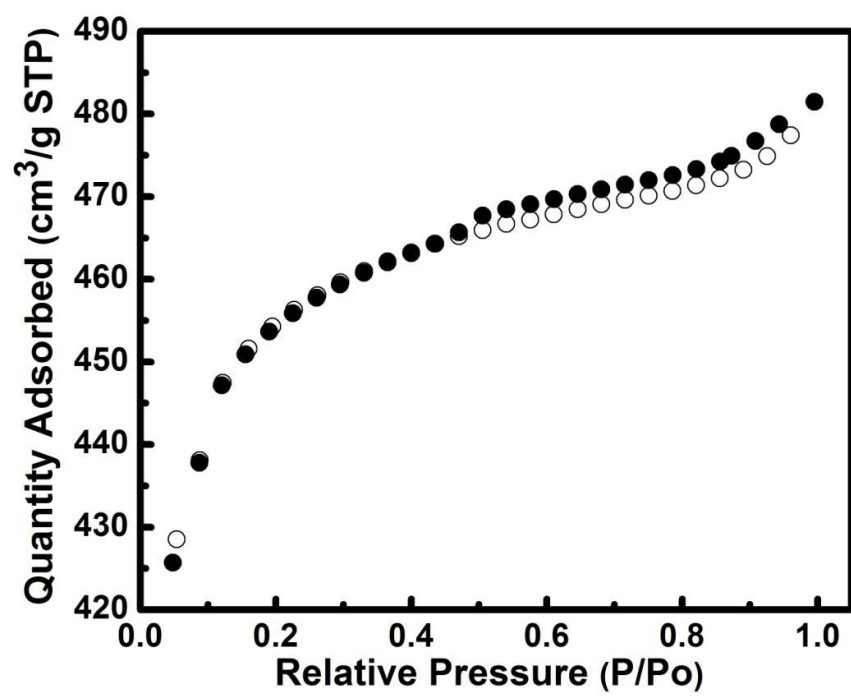

**Figure S3.** N<sub>2</sub> adsorption (empty circles) and desorption (filled circles) isotherms of bio-MOF-1.

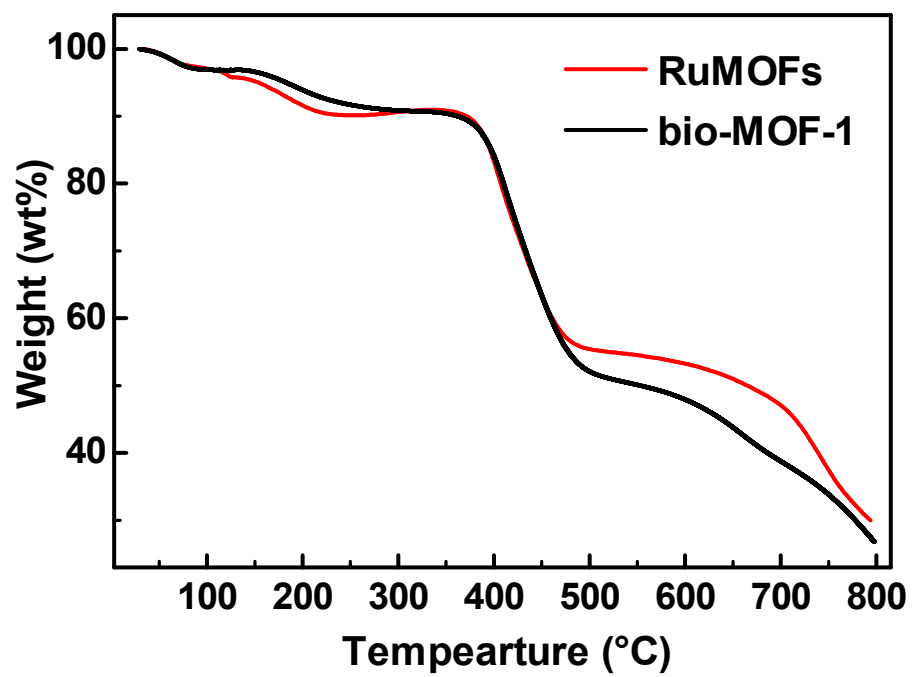

**Figure S4.** Thermogravimetric analysis of RuMOFs and bio-MOF-1

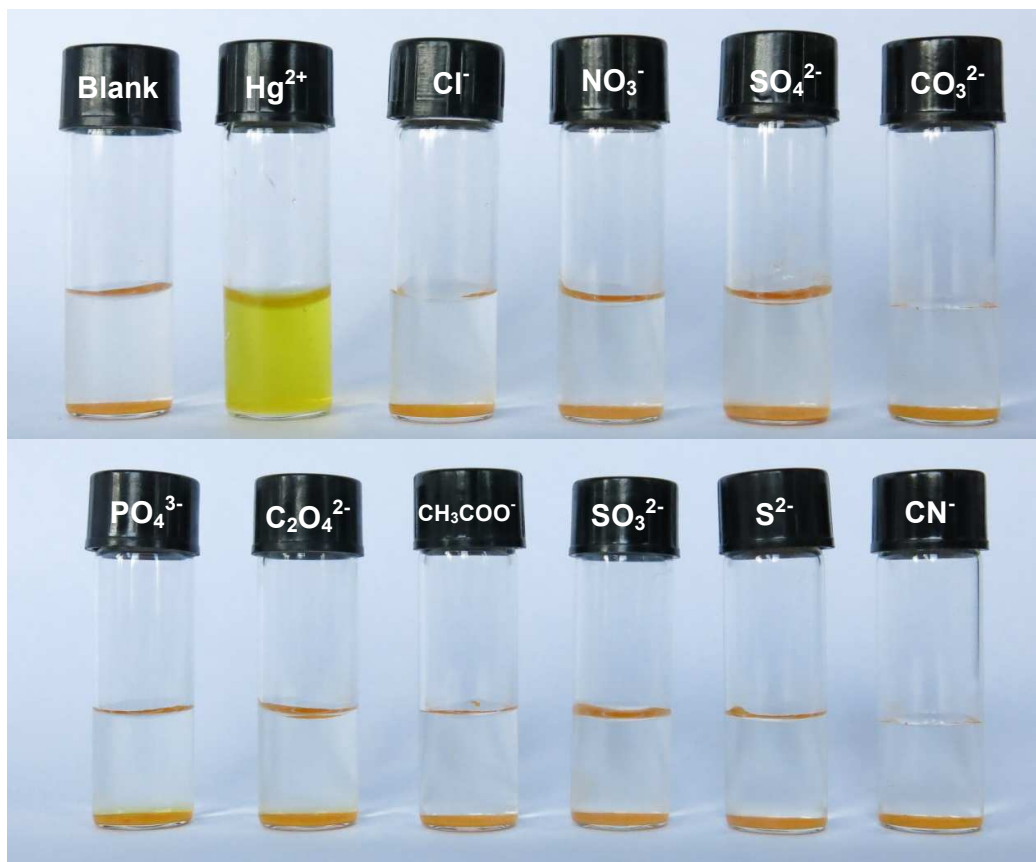

**Figure S5.** The photo taken for the interactions between RuMOFs and various anions in water. The concentration of each kind of anion was 100  $\mu\text{M}$ , and the counter ions were all  $\text{Na}^+$  ion. The blank sample (i.e. RuMOFs in pure water), and  $\text{Hg}^{2+}$  sample (i.e. RuMOFs in 100  $\mu\text{M}$   $\text{HgCl}_2$  solution) were provided for comparison.

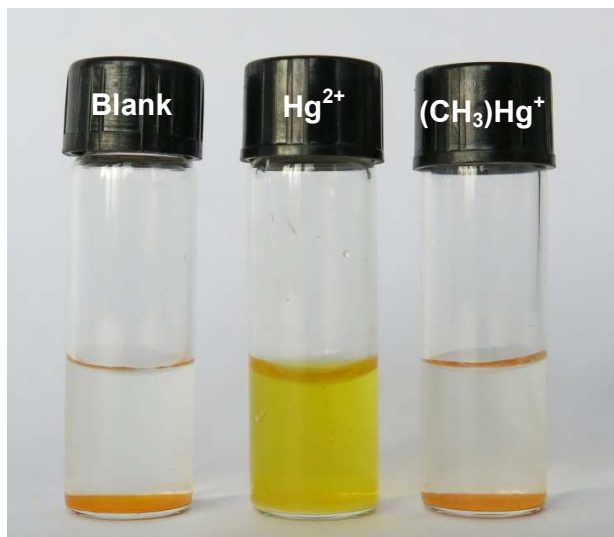

**Figure S6.** The photos comparing the interactions between RuMOFs and mercury species: inorganic mercury ion ( $\text{Hg}^{2+}$ ) and methylmercury ion ( $\text{CH}_3\text{Hg}^+$ ). The concentrations of  $\text{HgCl}_2$  and  $\text{CH}_3\text{HgCl}$  were all 100  $\mu\text{M}$ . The blank sample: RuMOFs in pure water.

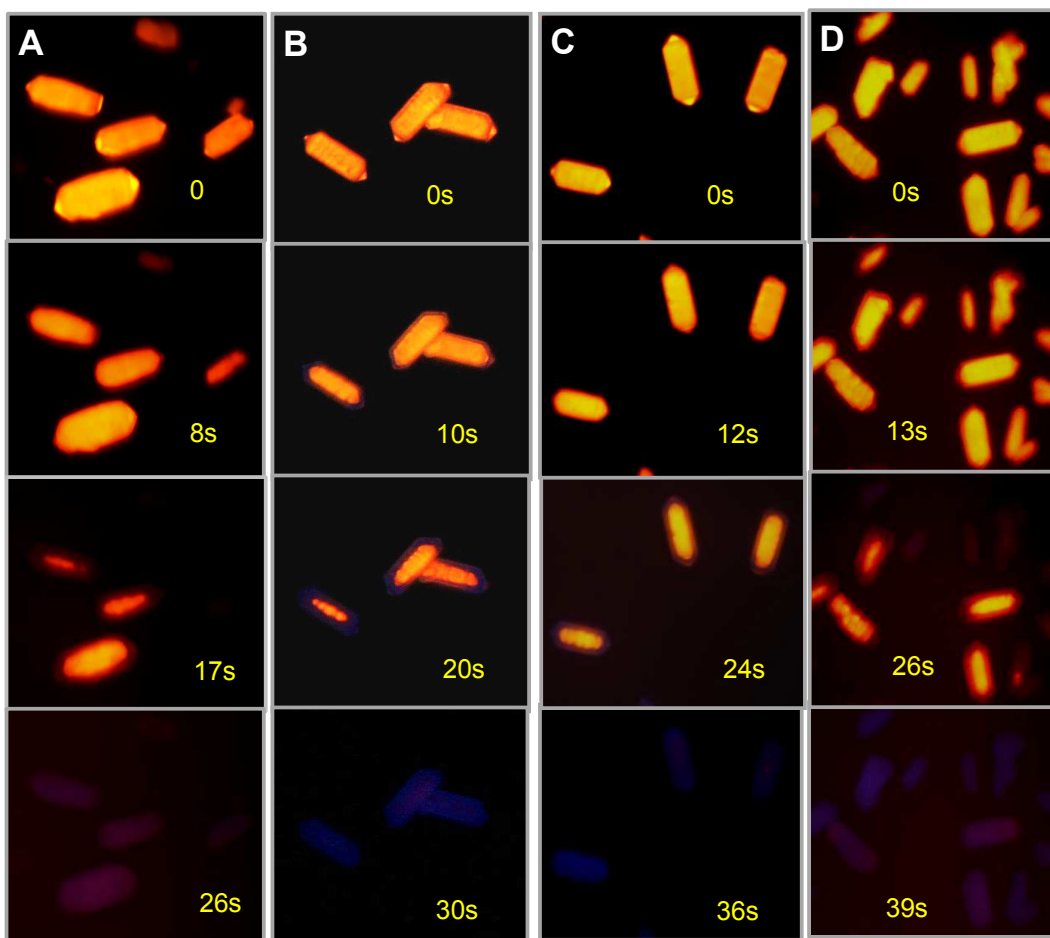

**Figure S7.** Fluorescence microscopic images obtained during  $\text{Ru}(\text{bpy})_3^{2+}$  release from RuMOFs at different  $\text{Hg}^{2+}$  concentrations: (A) 200  $\mu\text{M}$ ; (B) 100  $\mu\text{M}$ ; (C) 25  $\mu\text{M}$ ; (D) 10  $\mu\text{M}$ .



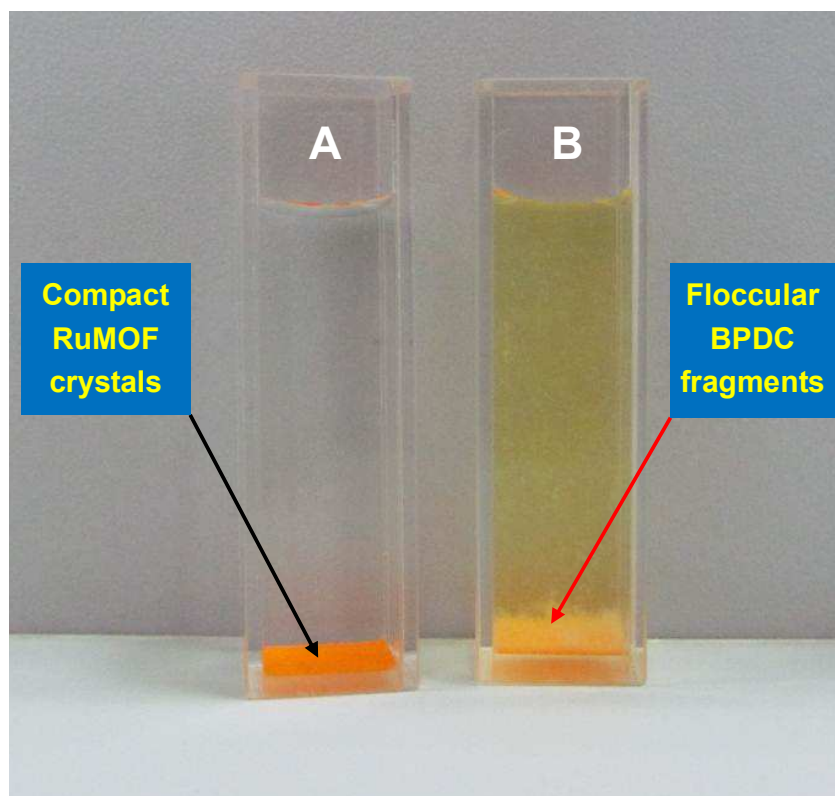

**Figure S8.** Photos taken for RuMOFs 12 hours after adding: (A) pure water; (B)  $\text{Hg}^{2+}$  solution.

**Table S1.** The amounts of  $\text{Ru}(\text{bpy})_3^{2+}$  released from RuMOFs in the presence of various concentrations of  $\text{Hg}^{2+}$  and induced release efficiencies (molar ratio of  $\text{Ru}(\text{bpy})_3^{2+}$  to  $\text{Hg}^{2+}$ )

| $C_{\text{Hg}^{2+}} \text{ (pM)}$ | $C_{\text{Ru}(\text{bpy})_3^{2+}} \text{ (}\mu\text{M)}$ | $R_{\text{Ru/Hg}} = C_{\text{Ru}(\text{bpy})_3^{2+}} / C_{\text{Hg}^{2+}}$ |
|-----------------------------------|----------------------------------------------------------|----------------------------------------------------------------------------|
| 1                                 | 5.47                                                     | 5470000                                                                    |
| 2.5                               | 6.11                                                     | 2440000                                                                    |
| 10                                | 7.58                                                     | 758000                                                                     |
| 25                                | 10.0                                                     | 400000                                                                     |
| 50                                | 16.0                                                     | 320000                                                                     |
| 75                                | 19.7                                                     | 263000                                                                     |
| 100                               | 25.6                                                     | 256000                                                                     |
| 250                               | 32.2                                                     | 128000                                                                     |
| 500                               | 38.9                                                     | 77800                                                                      |
| 2500                              | 48.3                                                     | 19300                                                                      |
| 5000                              | 56.3                                                     | 11300                                                                      |
| 10000                             | 62.1                                                     | 6210                                                                       |
| 50000                             | 72.2                                                     | 1440                                                                       |

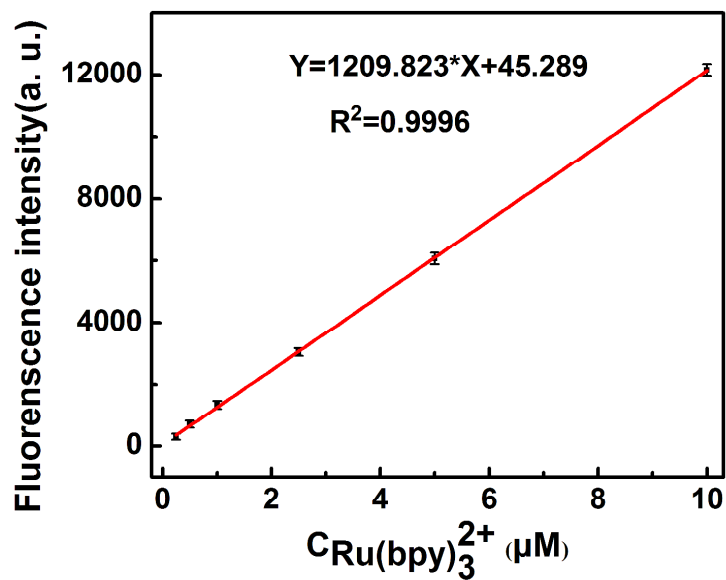

**Figure S9.** The standard working curve for FL determination of  $\text{Ru(bpy)}_3^{2+}$  in aqueous solution.

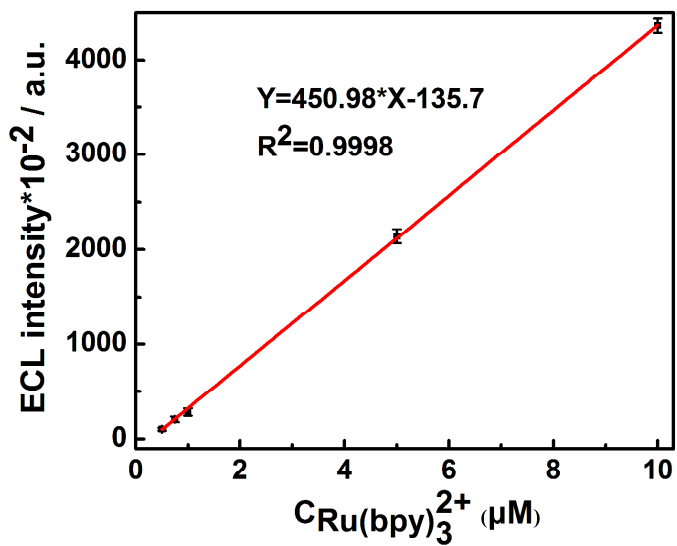

**Figure S10.** The standard working curve ECL determination of  $\text{Ru(bpy)}_3^{2+}$  in aqueous solution.

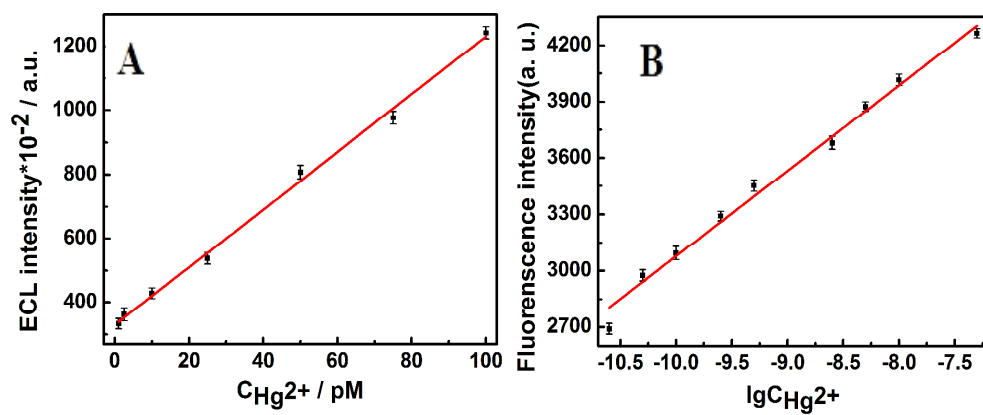

**Figure S11.** (A) The calibration plots of ECL intensity vs  $\text{Hg}^{2+}$  concentration (A) and FL intensity vs  $\text{Hg}^{2+}$  concentration (B)
